# Supplementary material
Source: MDPI journal article supplement (https://www.mdpi.com/2073-4433/11/10/1111)
Supplement: s1 [file s1]

## Supplemental information

Figure S1. Wind rose in Windsor during 1996-2015, a) all data, b) smog season (April to September).

Figure S2. Directional smog season mean O<sub>3</sub> concentrations in Windsor during 1996-2015. Boxes indicate the interquartile (the 25th to 75th percentile). Middle line in each box represents the median value. The mean value is indicated by a circle marker. Whiskers represent the 1.5 times interquartile ranges.

Figure S3. Smog season 24-hour backward trajectories arriving in Windsor in 2015.

Figure S4. Clustering of smog season 8-hour max O<sub>3</sub> concentrations averaged by 36 air mass trajectory directions in Windsor during 1996-2015.

Table S1. Result of Tukey's tests of 8-hour max O<sub>3</sub> and meteorological parameters by cluster in Windsor during 1996-2015 (in Table 3).

Table S2. Correlation coefficients between smog season hourly/daily O<sub>3</sub> concentrations and meteorological parameters in Windsor during 1996-2015.

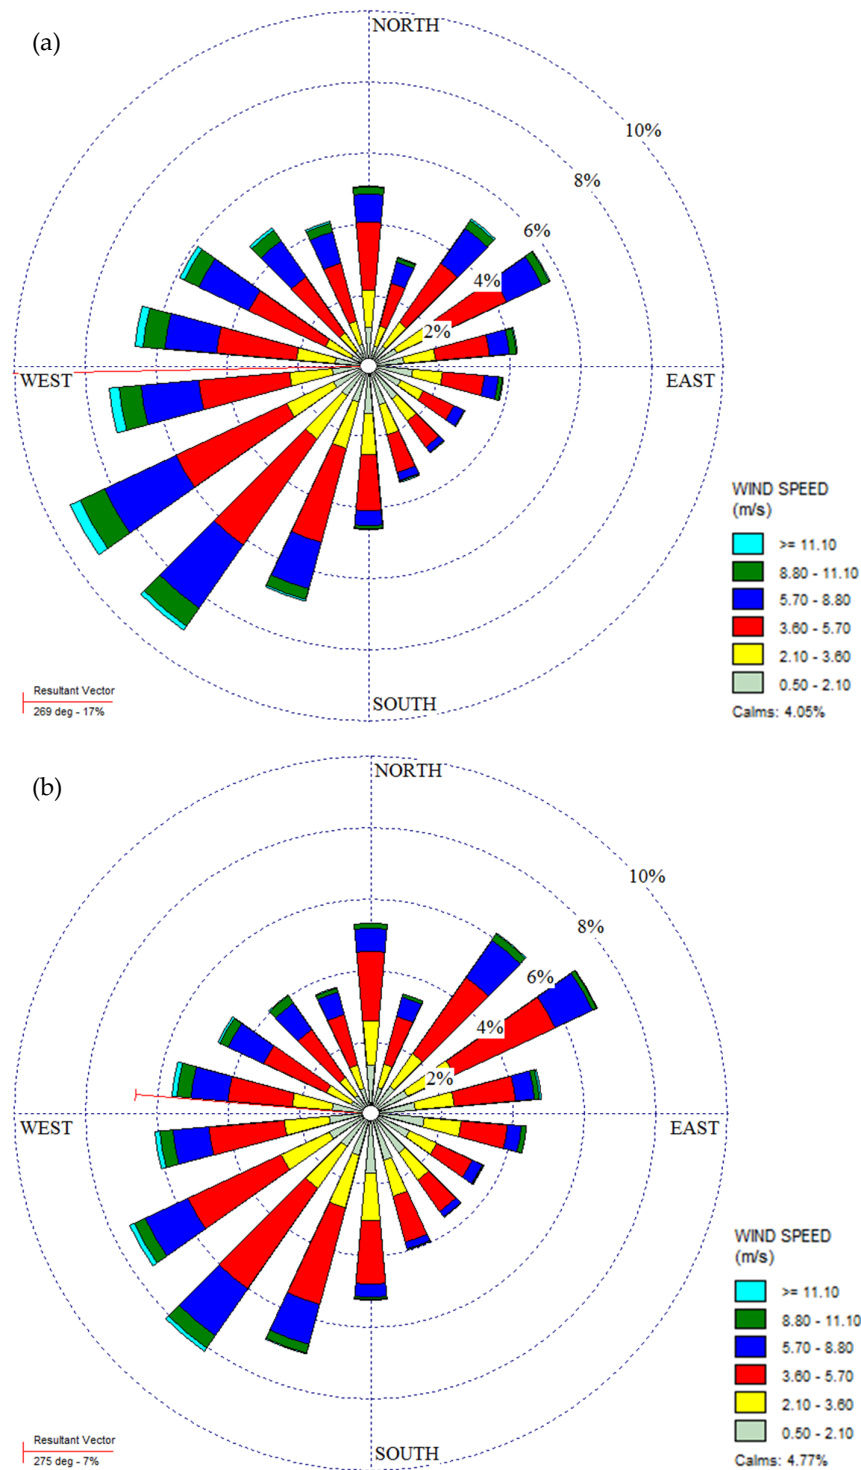

**Figure S1.** Wind rose in Windsor during 1996–2015, (a) all data, (b) smog season (April to September).

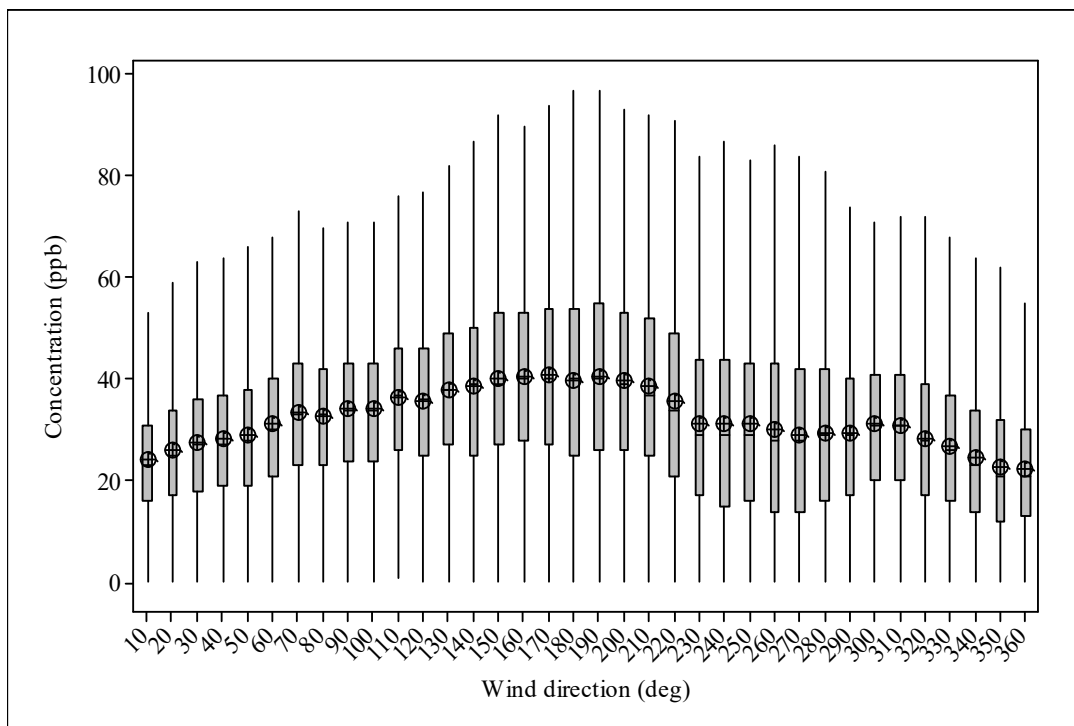

**Figure S2.** Directional smog season mean  $O_3$  concentrations in Windsor during 1996–2015. Boxes indicate the interquartile (the 25th to 75th percentile). Middle line in each box represents the median value. The mean value is indicated by a circle marker. Whiskers represent the 1.5 times interquartile ranges.

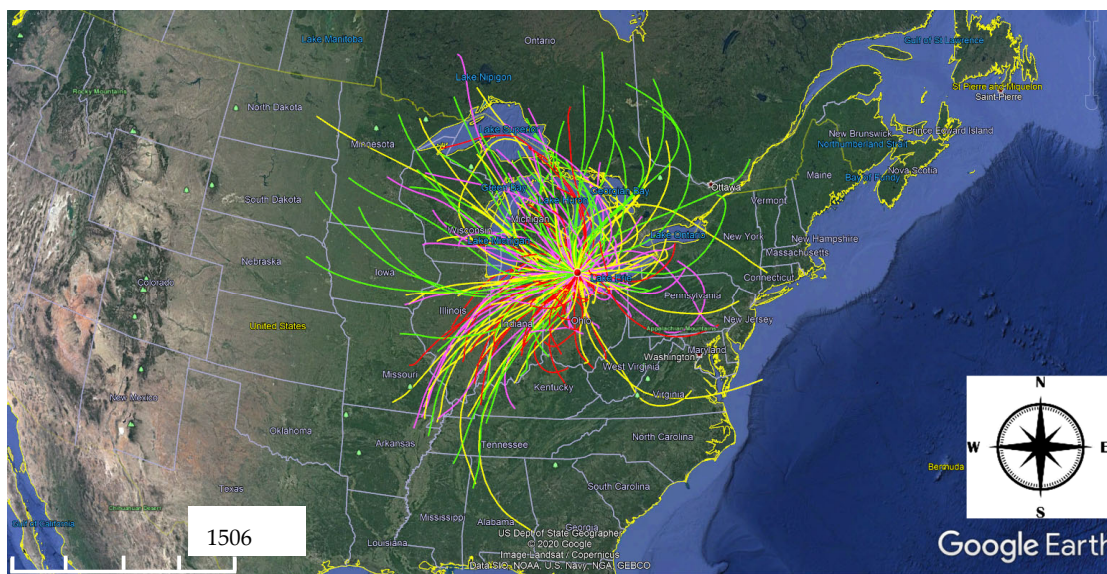

**Figure S3.** Smog season 24-hour backward trajectories arriving in Windsor in 2015. Trajectories in green, yellow, pink and red represent 8-hour max  $O_3$  concentration in Windsor was in 0th–25th, 25th–50th, 50th–75th, and 75th–100th percentile levels, respectively.

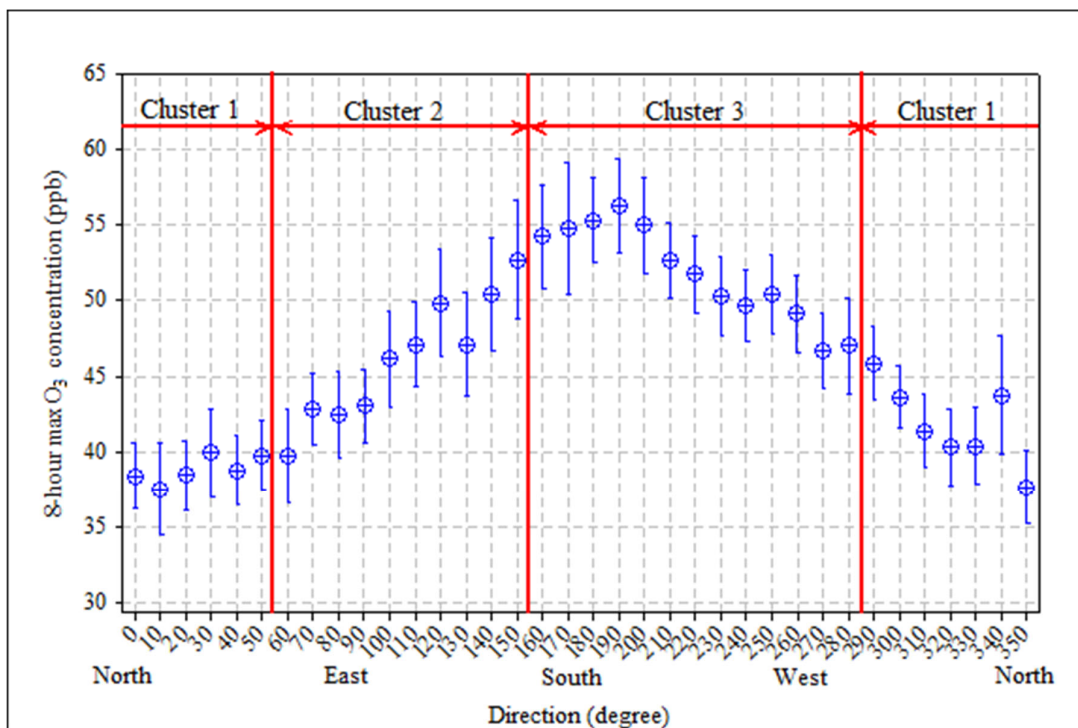

**Figure S4.** Clustering of smog season 8-hour max O<sub>3</sub> concentrations averaged by 36 air mass trajectory directions in Windsor during 1996–2015.

**Table S1.** Result of Tukey's tests of 8-hour max O<sub>3</sub> and meteorological parameters by cluster in Windsor during 1996–2015 (in Table 3). Clusters that do not share a letter are significantly different.

| Cluster   | 8-hour Max O <sub>3</sub> | Daily Mean Temp | Daily Mean Relative Humidity | Daily Mean Wind Speed | Daily Mean Atmospheric Pressure |
|-----------|---------------------------|-----------------|------------------------------|-----------------------|---------------------------------|
| Cluster 1 | C                         | B               | B                            | A                     | B                               |
| Cluster 2 | B                         | B               | A                            | B                     | A                               |
| Cluster 3 | A                         | A               | A                            | A                     | C                               |

**Table S2.** Correlation coefficients between smog season hourly/daily O<sub>3</sub> concentrations and meteorological parameters in Windsor during 1996–2015.

| Meteorological parameters  | Hourly O <sub>3</sub> (ppb) <sup>a</sup> | Daily O <sub>3</sub> (ppb) <sup>b</sup> |
|----------------------------|------------------------------------------|-----------------------------------------|
| Temperature (°C)           | 0.518 *                                  | 0.414 *                                 |
| Relative humidity (%)      | –0.521 *                                 | –0.238 *                                |
| Visibility (km)            | 0.031 *                                  | –0.08 *                                 |
| Wind speed (km/h)          | 0.316 *                                  | –0.023                                  |
| Atmospheric pressure (kpa) | –0.055 *                                 | 0.011                                   |

<sup>a</sup>: Spearman's rank correlation coefficients; <sup>b</sup>: Pearson correlation coefficients; \*: significant at  $p < 0.05$ .
